# Supplementary material
Source: PubMed Central journal article supplement (PMC3648080)

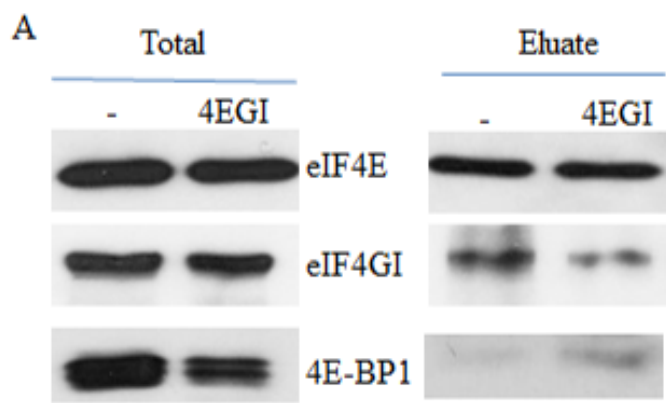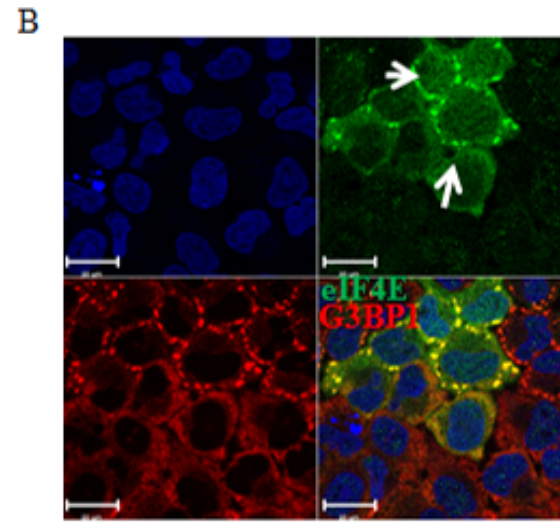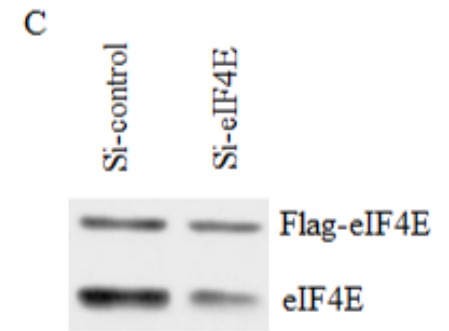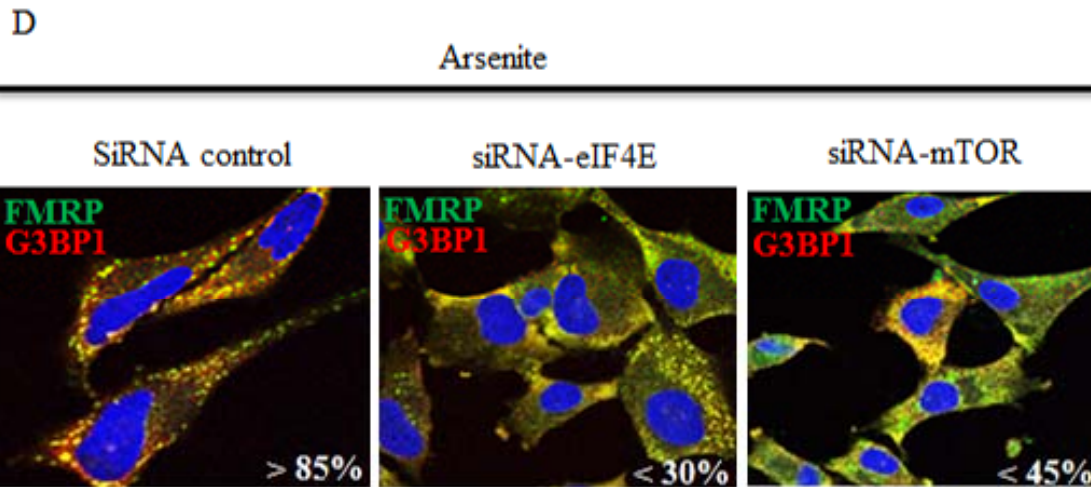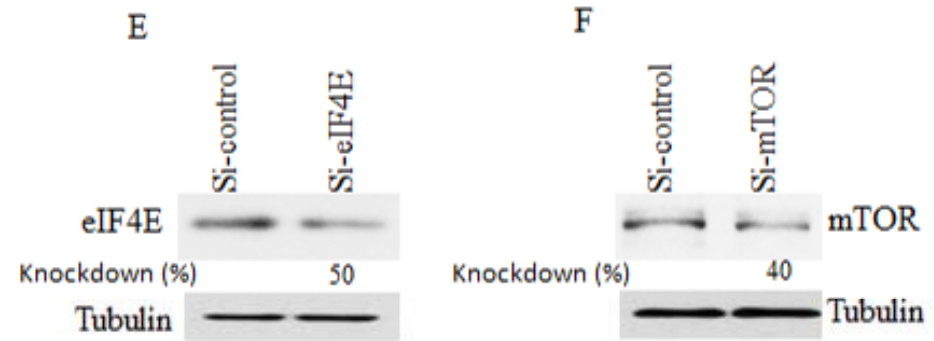

Supplementary Figure 1

Supplement: MCB.01517-12_zmb999109993so1.pdf [file MCB.01517-12_zmb999109993so1.pdf]

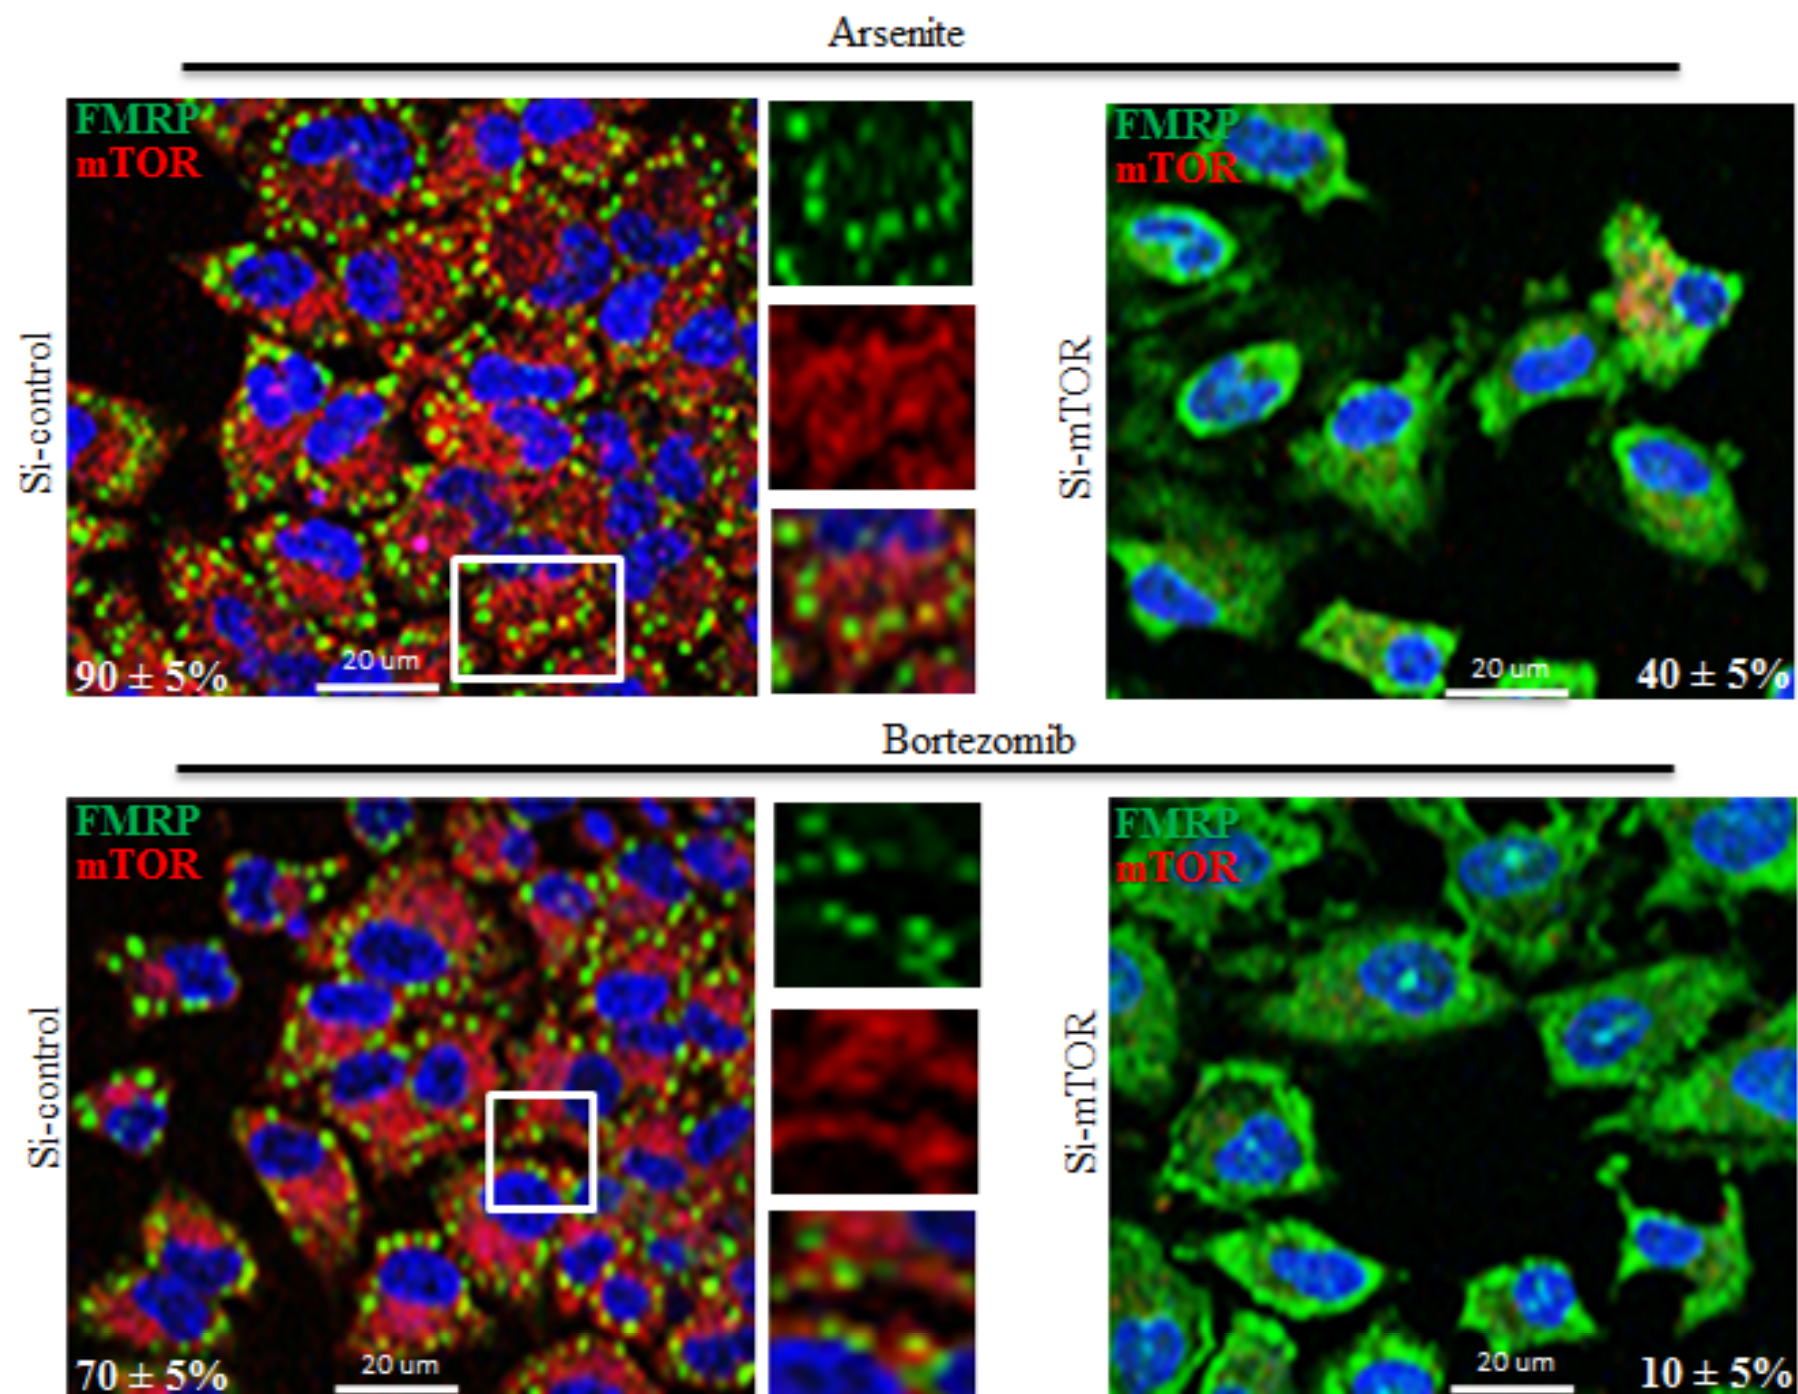

Supplementary Figure 2

Supplement: MCB.01517-12_zmb999109993so2.pdf [file MCB.01517-12_zmb999109993so2.pdf]

A

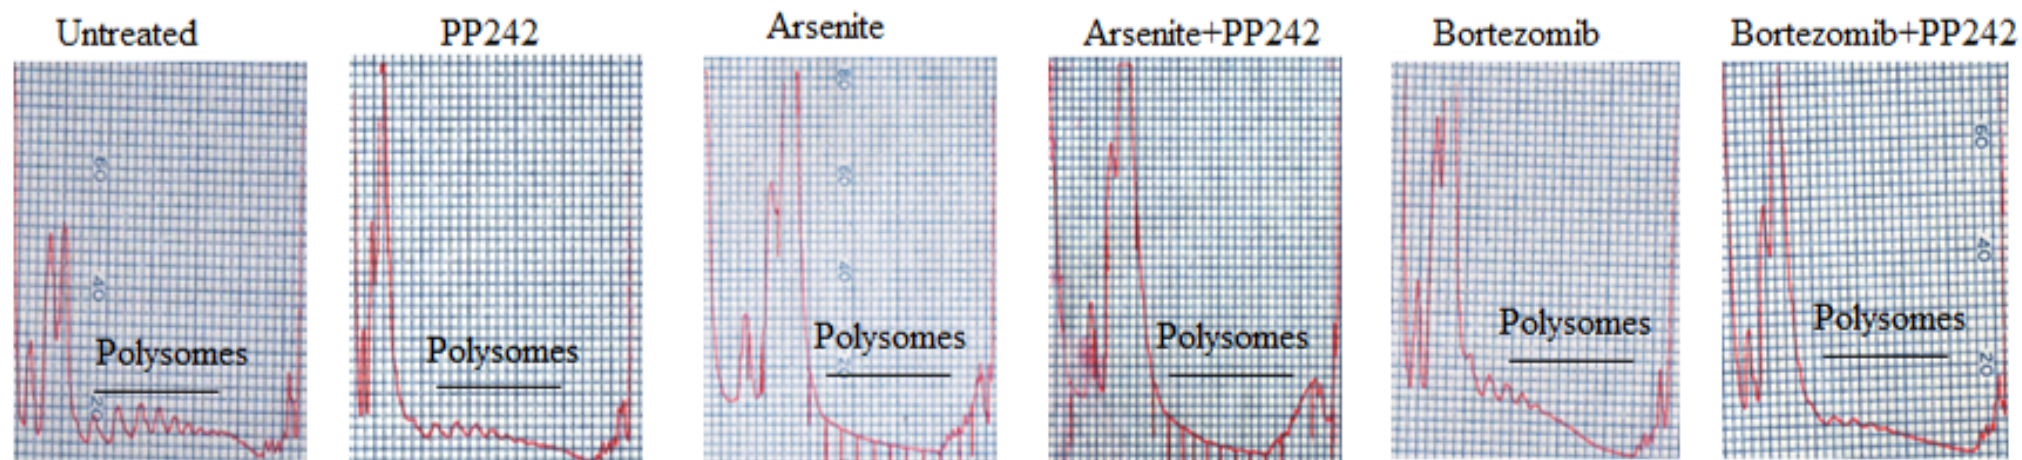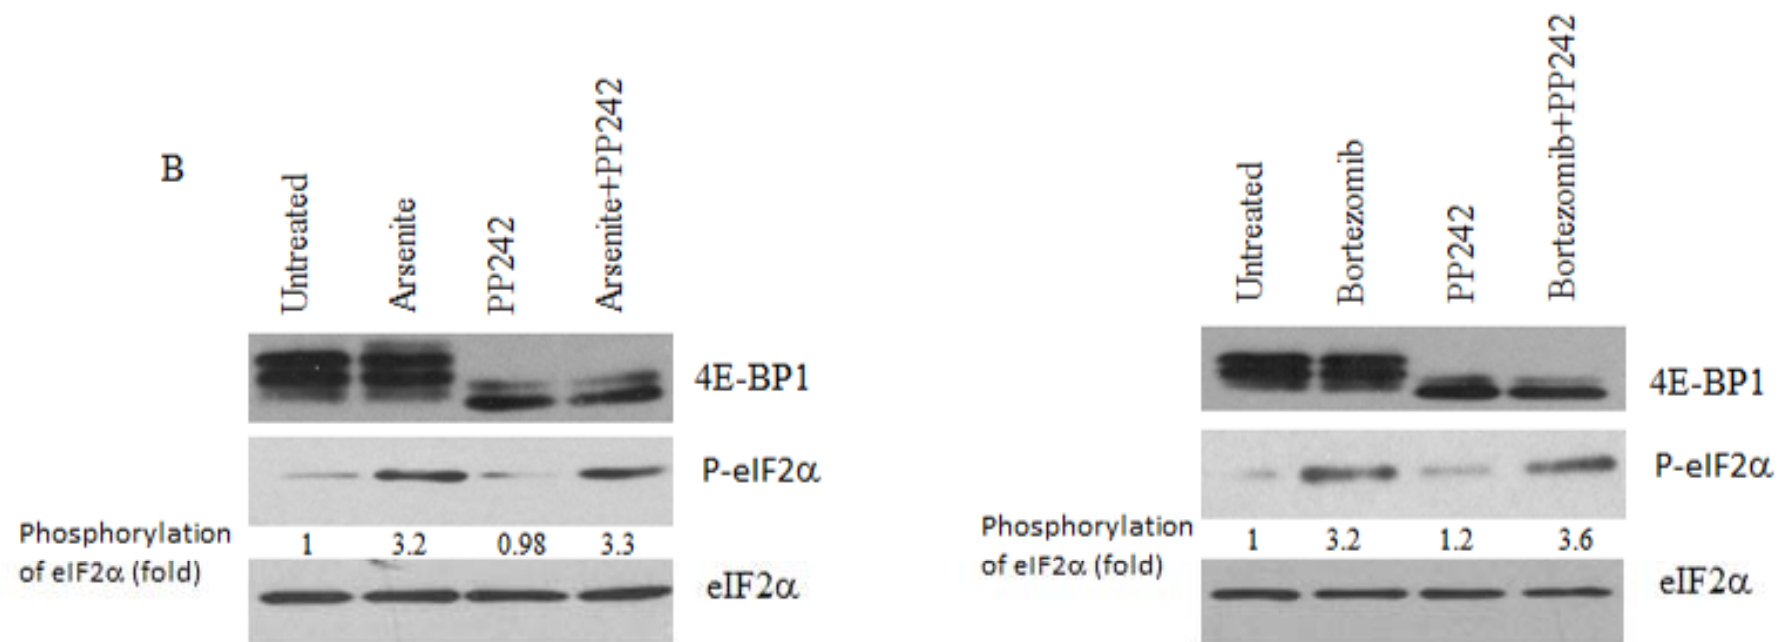

Supplementary Figure 4

Supplement: MCB.01517-12_zmb999109993so4.pdf [file MCB.01517-12_zmb999109993so4.pdf]

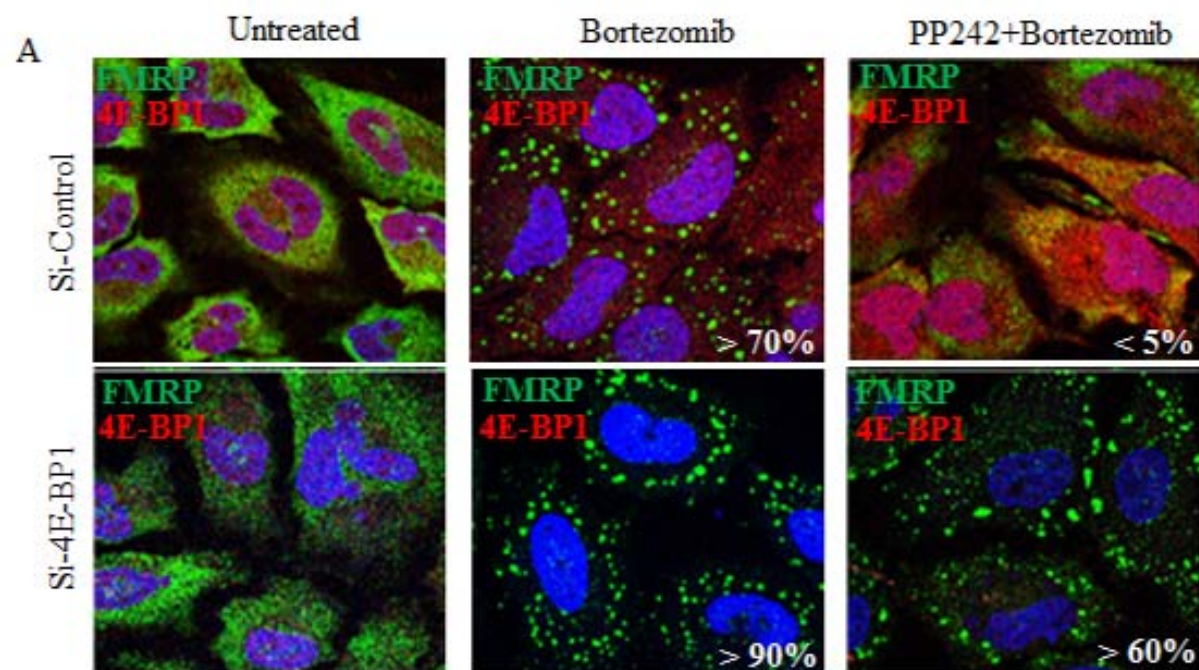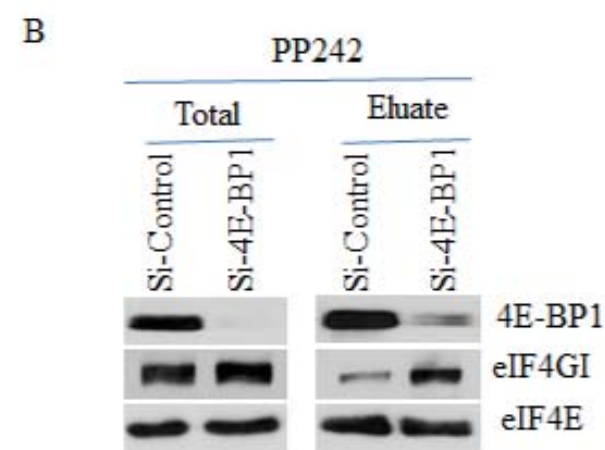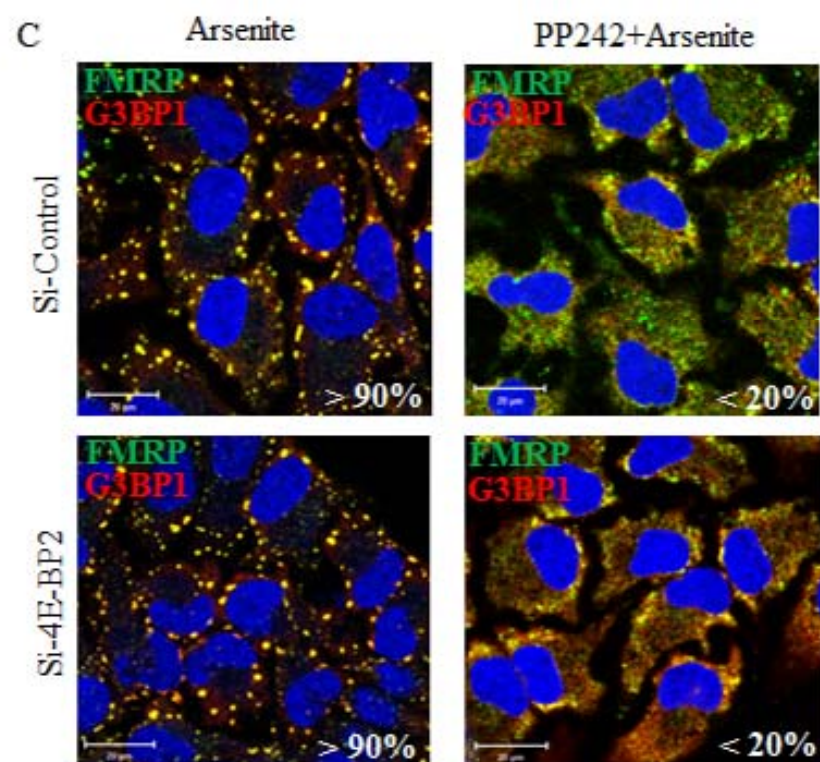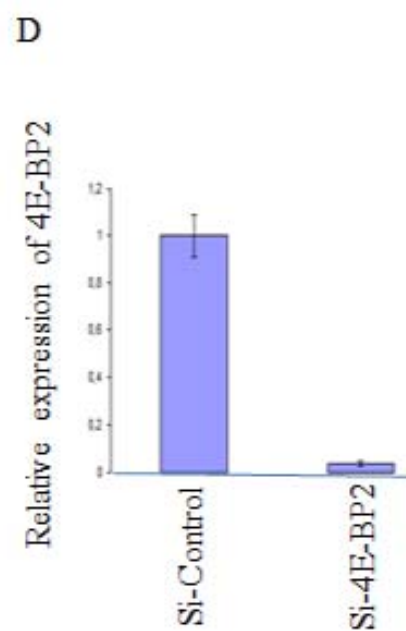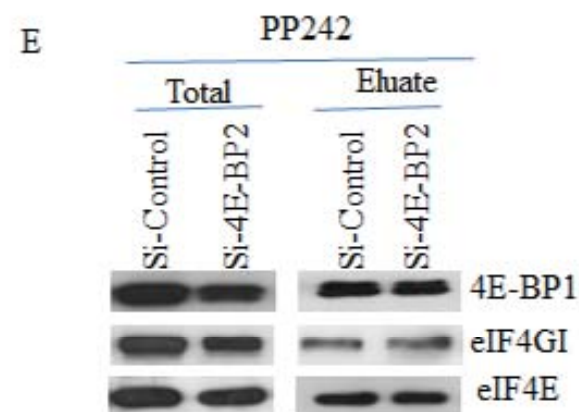

Supplementary Figure 5

F

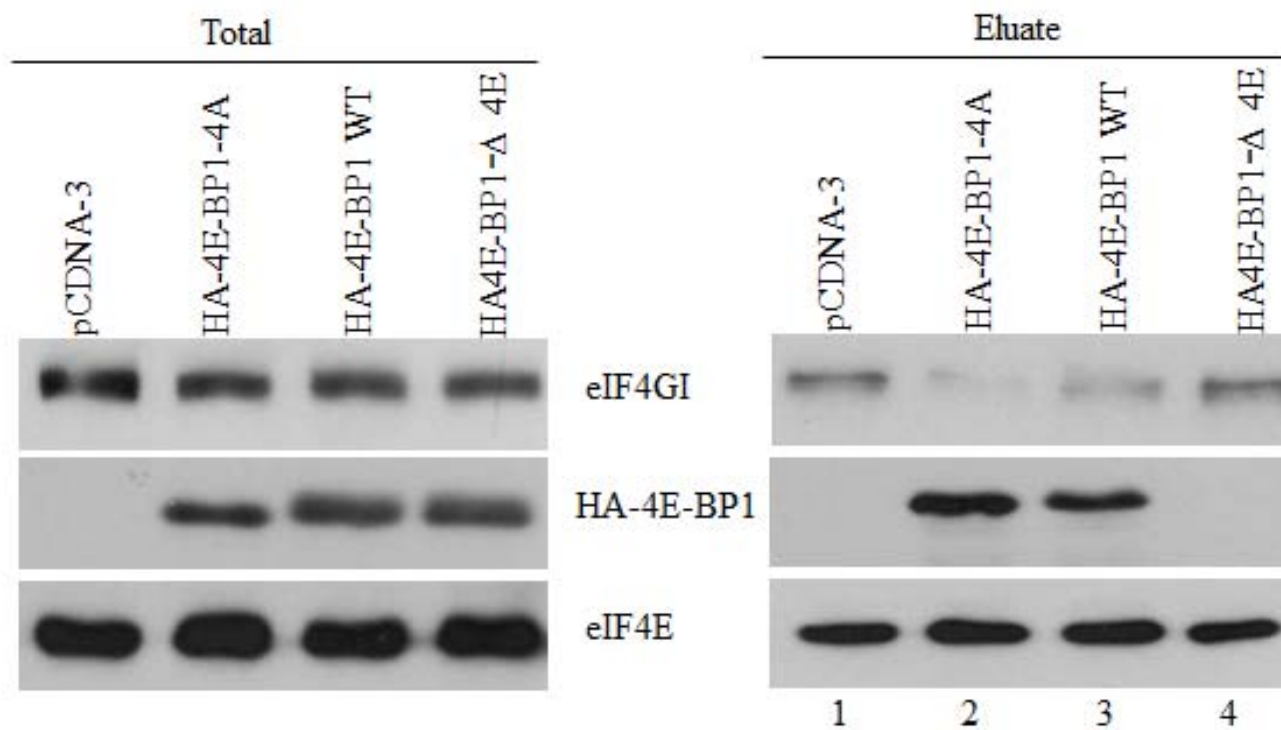

G

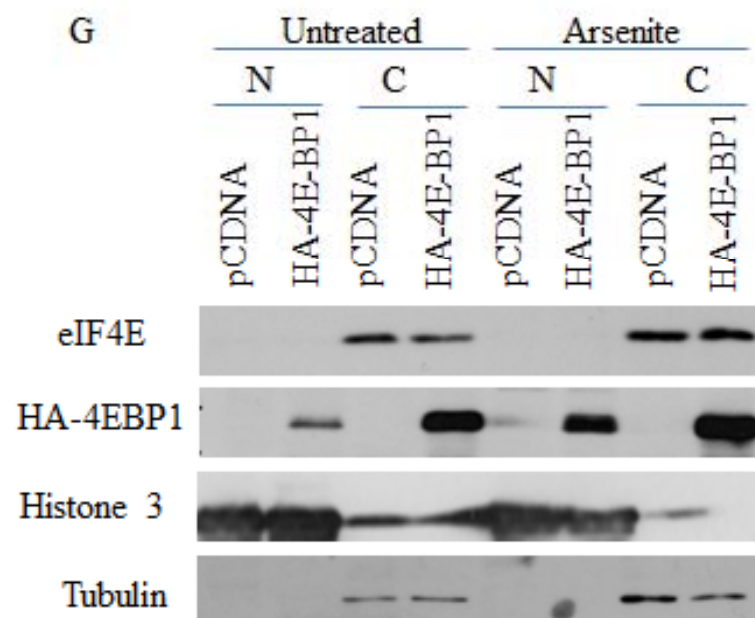

Supplementary Figure 5

Supplement: MCB.01517-12_zmb999109993so5.pdf [file MCB.01517-12_zmb999109993so5.pdf]

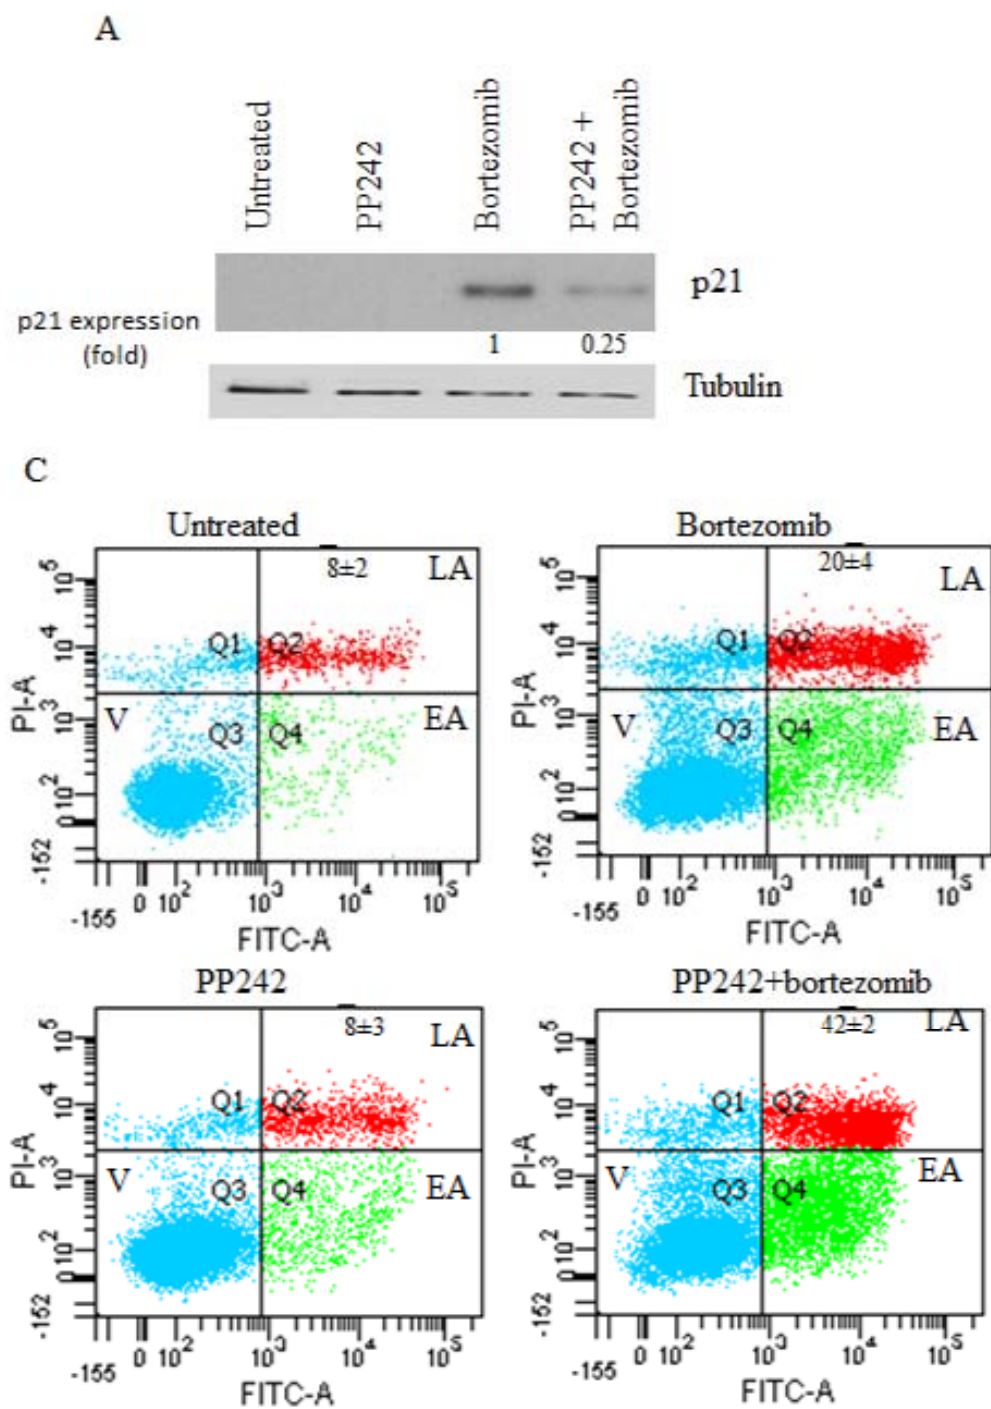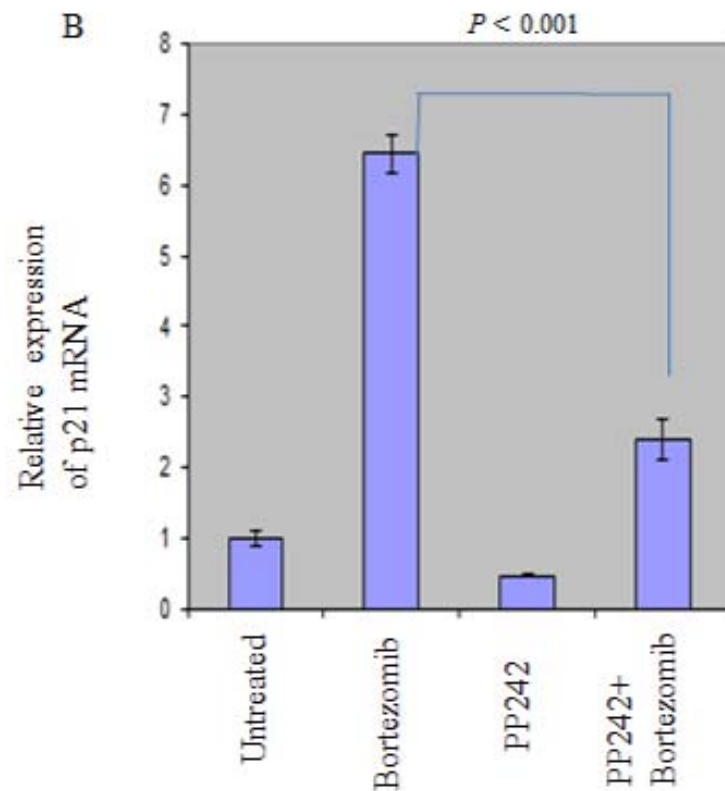

Supplementary Figure 7

Supplement: MCB.01517-12_zmb999109993so7.pdf [file MCB.01517-12_zmb999109993so7.pdf]
